# Supplementary material for: Generation of a neuro-specific microarray reveals novel differentially expressed noncoding RNAs in mouse models for neurodegenerative diseases
Source: RNA. 2014 Dec;20(12):1929–43. doi: 10.1261/rna.047225.114 (PMC4238357; doi:10.1261/rna.047225.114)
Supplement: Supplemental Material [file supp_047225.114_SuppTable1_DiffExpressedMiRNAsAndTargets.xlsx]

## Sheet: Tabelle1
ID	FC	ncRNA Annotation	Host Gene	Localization	p-Value (BH)	Analysis	Tissue	Targets Mirna Map*
e3080	1.52	mmu-mir-204-5p	Trpm3	intron_se	0.0009	Cav1.3 -/-	hippocampus	Kcnc4, Kcna2, Kcnj4, Cacnb3, Kcnb1, Cacna2d2, Cacna2d4, Cacng2, Cacnb1, Cacnb4, Scn5a, Cacna1d, Kcnc2, Kcnt1
e2138	1.22	mmu-mir-143-3p	NA	intergenic	0.03	Cav1.3 -/-	hippocampus	Kcnd1, Kcna4, Kcnb1, Scn1b, Cacna1a, Cacna2d2, Scn4a, Kcnc4, Kcnj6
e833	1.48	mmu-mir-6538	Bai1	intron_se	2e-05	CACNB4 variant	cerebellum
e2248	-1.56	mmu-miR-222-3p	NA	intergenic	0.0001	CACNB4 variant	cerebellum	Cacna2d2, Kcnj6, Cacna1g, Cacnb4, Kcnt1, Cacna2d4
e2246	-1.48	mmu-miR-221-3p	NA	intergenic	0.0002	CACNB4 variant	cerebellum	Cacna1g, Cacnb4, Kcnd1, Kcnj6, Cacna2d4, Kcnh2
e2150	1.51	mmu-miR-219a-5p	NA	intergenic	0.0004	CACNB4 variant	cerebellum	Kcnj6
e3422	1.37	mmu-miR-15b	Smc4	intron_se	0.001	CACNB4 variant	cerebellum	Kcnd1, Cacnb3, Kcnb1, Kcnc4, Scn1b, Kcna2, Kcnq2, Cacna2d1, Cacna1e, Kcna4, Cacna1c, Kcnh3, Scn1a, Cacna1a, Cacna2d2, Scn4a, Kcnj4, Cacna1g, Cacng2, Kcnj6, Kcnt1, Kcnh5, Kcnh2, Cacnb4, Kcnc2, Kcna1, Cacna1b, Kcnn2, Kcnj2
e3210	-1.26	mmu-miR-486-5p	Ank1	intron_se	0.003	CACNB4 variant	cerebellum	Cacna1c, Cacnb3, Kcnh3, Kcnh2, Cacna1b, Scn1a, Kcnb1, Scn1b, Cacna1a, Scn4a, Kcnj6, Kcnt1, Cacnb1
e2030	-1.17	mmu-miR-195a-5p	NA	intergenic	0.007	CACNB4 variant	cerebellum	Kcnc4, Kcnc2, Cacna1e, Cacna1c, Kcnq2, Kcnj6
e2194	-1.15	mmu-miR-129-1-3p	NA	intergenic	0.02	CACNB4 variant	cerebellum	Cacna1b, Scn1b, Scn4a, Kcnh2, Cacna1e, Kcna4, Cacna1c, Kcnd1, Kcnb1, Cacng2, Kcnj6, Kcnc4, Cacnb4, Scn5a
e2236	1.2	mmu-miR-135a-5p	Glyctk	exon_se	0.02	CACNB4 variant	cerebellum	Scn1a, Scn5a, Kcnc2, Kcnb1, Kcnj6, Kcnj4, Cacnb4, Cacna1e, Kcnd1, Cacna2d2, Cacna1g
e2193	1.15	mmu-miR-181a-5p	NA	intergenic	0.02	CACNB4 variant	cerebellum	Kcnc2, Kcna4, Scn1a, Kcnb1, Cacna2d2, Kcnq2, Cacna1g, Cacna2d1, Kcnj6, Kcna1, Scn1b, Kcnj4
e2022	1.18	mmu-miR-340-5p	Rnf130	intron_se	0.03	CACNB4 variant	cerebellum	Kcnj4, Kcnq2, Cacna1b, Cacna1c, Kcnh3, Scn1a, Kcnc4, Cacna2d2, Scn4a
e2252	1.3	mmu-miR-322-5p	NA	intergenic	0.04	CACNB4 variant	cerebellum	Cacna1c, Kcnh3, Cacna2d2
*http://mirnamap.mbc.nctu.edu.tw
