# Supplementary material for: Generation of a neuro-specific microarray reveals novel differentially expressed noncoding RNAs in mouse models for neurodegenerative diseases
Source: RNA. 2014 Dec;20(12):1929–43. doi: 10.1261/rna.047225.114 (PMC4238357; doi:10.1261/rna.047225.114)
Supplement: Supplemental Material [file supp_047225.114_SuppTable2_DiffExpressedCandidates.xlsx]

## Sheet: Sheet1
ID	OldOligoID	FC	Biotype	ncRNA Annotation	Host Gene	Localization	Chromosome Position (mm9)#	P-Value (BH)	Analysis	Oligonucleotide	Additional Oligos (same ncRNA)*	Number of positions mapped to the genome
e652	39	1.5541	5' tRF	tRNA (Asp) GTC	NA	intergenic	chr10:90644842-90644920_-	2.275e-07	Cav1.3_Striatum	AGGCGGGGATACTAACCACTATACTAACG		2
e499	21066	2.35182	unknown	NA	Vmn2r63	intron_se	chr7:50169342-50169362_+	8.335e-05	Cav1.3_Striatum	CCGCTGGTTCCTCCCGCT		1
e202	178	1.42147	5' tRF	tRNA (Gly) CCC	NA	intergenic	chr1:172975116-172975190_+	0.000287807	Cav1.3_Striatum	AATTCTACCACTGAACCACCAATGC		12
e880	60361	1.44137	processed_transcript	NA	NA	intergenic	chr16:70237950-70238013_-	0.000287807	Cav1.3_Striatum	CTGAGCCATCTCTCCAGCCCA		1
e322	20424	1.30194	5' tRF	tRNA (Glu) CTC	NA	intergenic	chr15:3742963-3743001_+	0.000302457	Cav1.3_Striatum	CCGATTCCTAACCACTAGACCACCAG		1
e1022	88	-1.37792	unknown	NA	NA	intergenic	chr1:133470363-133470391_+	0.00140484	Cav1.3_Striatum	CTTCCGTACGCCACATTTCCC		1
e279	20247	1.30719	tRF	tRNA (Glu) CTC	NA	intergenic	chr12:43516105-43516133_-	0.00143561	Cav1.3_Striatum	ACTCCTAACCACTAGACCACCAGGGAC		1
e792	560	1.33634	unknown	NA	NA	intergenic	chr16:33047694-33047781_+	0.00143561	Cav1.3_Striatum	TGAGCCATCTCTCCAGCCCG		2
e130	118_1	-1.67267	3' tRF	tRNA (Lys) CTT	Trim7	intron_se	Chr11:48647373-48647460_-	0.00159526	Cav1.3_Striatum	AGCATGCGCCCAACGTGG		1
e871	60333	1.34576	unknown	NA	NA	intergenic	chr13:119218791-119218853_-	0.001775	Cav1.3_Striatum	GTTGAGCCATCTCTCCAGCCC		2
e203	178_1	-1.52728	3' tRF	tRNA (Gly) CCC	NA	intergenic	chr1:172975116-172975190_+	0.00327828	Cav1.3_Striatum	TGGCCGGGAATCGAACCC		19
e890	604	1.33656	ncRNA prediction	NA	NA	intergenic	chr17:26012032-26012104_+	0.00327828	Cav1.3_Striatum	ATGATACCACTACACCAGCGGCG		2
e2506	20456	1.37963	unknown	NA	NA	intergenic	chr15:79279085-79279112_+	0.00510909	Cav1.3_Striatum	ACGGCTGAGCCATCTCTCCAGCCCC		69
e2043	10103	-1.25744	unknown	NA	NA	intergenic	chr12:89595856-89595874_+	0.00747379	Cav1.3_Striatum	CTTCCGTACGCCACATGT		1
e2265	1121_1	1.26861	Y RNA	NA	NA	intergenic	chr6:47738064-47738180_-	0.00771639	Cav1.3_Striatum	GAGATAACTCACTACCTTCGGACCAG	e884, e60274	1
e609	30119	1.22507	unknown	NA	NA	intergenic	chr6:124685118-124685138_+	0.0117467	Cav1.3_Striatum	AGGTCCCCCCCCCCCACC		6
e519	21135	1.21374	5' tRF	tRNA (Glu) CTC	NA	intergenic	chr8:37589115-37589151_-	0.0132382	Cav1.3_Striatum	TCCTAACCACTAGACCGCCAGGG		1
e891	60404	1.38419	unknown	NA	NA	intergenic	chr1:20732738-20732802_-	0.0162839	Cav1.3_Striatum	TGAGCCATCTCTCCAGCCCAT		3
e511	21098	1.26723	5' tRF	tRNA (Glu) CTC	Arrb1	intron_se	chr7:106692447-106692481_-	0.0187139	Cav1.3_Striatum	AGCACCGAAGCCTAACCACTAGACC		1
e415	20661	1.43504	7SK RNA	NA	NA	intergenic	chr2:23678352-23678376_+	0.0249449	Cav1.3_Striatum	AGCCAGATCGCCCTCACATCC		5
e934	648.1	1.25287	5' tRF	tRNA Glu (GAG)	NA	intergenic	chr1:172994250-172994372_-	0.0294755	Cav1.3_Striatum	AATCCTAACCACTAGACCACCAGGGA		12
e2372	1539.2_3	-1.2138	unknown	NA	NA	intergenic	chrM:1699-2205_+	0.035538	Cav1.3_Striatum	CTTCTCGTCTTATTATTATATTTCAG		4
e167	1486	1.17736	unknown	NA	NA	intergenic	chr9:3260367-3260406_-	0.0363262	Cav1.3_Striatum	GAGGGCCTCACTAAACCATCCAATC		1
e141	1352	1.1975	ncRNA prediction	NA	Slc35f3	intron	chr8:128733632-128733660_-	0.0390932	Cav1.3_Striatum	GTTCAGAGCACTGGGCAGAAATCAC		1
e499	21066	1.67894	unknown	NA	Vmn2r63	intron_se	chr7:50169342-50169362_+	3.86e-05	Cav1.3_Hippocampus	CCGCTGGTTCCTCCCGCT		1
e885	60386	1.26048	unknown	NA	Lmnb1	exon_as	chr18:56867748-56867766_-	0.00562001	Cav1.3_Hippocampus	TTCGGTCCCGCCGCCCCC		1
e3080	50043	1.52039	miRNA	mmu-mir-204-5p	Trpm3	intron_se	chr19:22825098-22825123_+	0.00923368	Cav1.3_Hippocampus	AGGCATAGGATGACAAAGGGAA		1
e652	39	1.20269	5' tRF	tRNA (Asp) GTC	NA	intergenic	chr10:90644842-90644920_-	0.033607	Cav1.3_Hippocampus	AGGCGGGGATACTAACCACTATACTAACG		2
e2138	10249	1.22207	miRNA	mmu-mir-143-3p	NA	intergenic	chr18:61808850-61808874_-	0.033607	Cav1.3_Hippocampus	AGCTACAGTGCTTCATCTCA		1
e885	60386	1.59204	unknown	NA	Lmnb1	exon_as	chr18:56867748-56867766_-	6.86809e-08	Cacnb4_Cerebellum	TTCGGTCCCGCCGCCCCC		1
e467	20870	1.59726	unknown	NA	Htr1d	intron_as	chr4:135981396-135981422_-	7.80142e-07	Cacnb4_Cerebellum	CCCGGCCCCCACCCCCAC		18
e1007	810_2	1.40927	unknown	NA	Camk1d	intron_se	chr2:5300274-5300422_-	4.87381e-06	Cacnb4_Cerebellum	CTCCCGCCGTTTACCCGC		6
e833	60084	1.48398	miRNA	mmu-mir-6538	Bai1	intron_se	chr15:74394260-74394278_+	1.69949e-05	Cacnb4_Cerebellum	CCCGCCGCCCCGGAGCCC		1
e283	20269	1.47216	unknown	NA	Ccdc85c	intron_se	chr12:109457405-109457424_+	6.9272e-05	Cacnb4_Cerebellum	CCCGCCCCCCACCGGGCC		1
e593	30025	1.37635	unknown	NA	Cdk5rap3	intron_se	chr11:96770287-96770308_-	8.41608e-05	Cacnb4_Cerebellum	AGCCCCCCCCCCCCACCC		25
e609	30119	1.43727	unknown	NA	NA	intergenic	chr6:124685118-124685138_+	0.000119158	Cacnb4_Cerebellum	AGGTCCCCCCCCCCCACC		6
e2248	10543	-1.55615	miRNA	mmu-miR-222-3p	NA	intergenic	chrX:18724024-18724051_-	0.000119158	Cacnb4_Cerebellum	CCCAGTAGCCAGATGTAGCT		1
e3911	200068	1.56588	ncRNA prediction	Biograph	Gch1	intron_se	chr14:47807491-47807589_-	0.000119158	Cacnb4_Cerebellum	GGGCCCCACCCTTCTCAGGCTCTGAT		1
e2246	10541	-1.48269	miRNA	mmu-miR-221-3p	NA	intergenic	chrX:18723431-18723455_-	0.000203195	Cacnb4_Cerebellum	AACCCAGCAGACAATGTAGCT		1
e397	20624	1.50272	unknown	NA	Ccdc85c	intron_se	chr12:109457405-109457424_+	0.000349645	Cacnb4_Cerebellum	CCGCCCCCCACCGGGCCC		1
e871	60333	-1.4	unknown	NA	NA	intergenic	chr13:119218791-119218853_-	0.03097	Cacnb4_Cerebellum	GTTGAGCCATCTCTCCAGCCC		2
e170	1492_1	-1.198	snoRNA	U14 snoRNA	Hspa8	intron_se	chr9:40612078-40612166_+	0.000377411	Cacnb4_Cerebellum	TCAGACATCCAAGGAAGGAACTAGCC	e2322, e168, e169, e171	2
e2150	10287	1.51037	miRNA	mmu-miR-219a-5p	NA	intergenic	chr2:29701205-29701229_-	0.000423475	Cacnb4_Cerebellum	AAGAATTGCGTTTGGACAATCA		1
e853	60202	1.25687	unknown	NA	Stk32b	intron_as	chr5:38038576-38038594_+	0.000808416	Cacnb4_Cerebellum	CTGCCAAGCCCGTTCCCT		1
e3422	886	1.37021	miRNA	mmu-miR-15b-5p	Smc4	intron_se	chr3:68813696-68813722_+	0.000963426	Cacnb4_Cerebellum	AAACCATGATGTGCTGCTA		1
e634	341_2	1.33401	unknown	NA	Il31ra	intron_se	chr13:113368371-113368562_-	0.00101208	Cacnb4_Cerebellum	CTTGGCTGTGGTTTCGCTGGATA		9
e897	60437	1.25053	unknown	NA	NA	intergenic	chr14:57312830-57313022_-	0.0017451	Cacnb4_Cerebellum	CTTCTTTCCCCGCTGATTCTG		1
e3210	53000	-1.25971	miRNA	mmu-miR-486-5p	Ank1	intron_se	chr8:24253059-24253081_+	0.00269914	Cacnb4_Cerebellum	CTCGGGGCAGCTCAGTACAG		2
e325	20445	1.32184	unknown	NA	Wdyhv1	intron_se	chr15:57986269-57986287_-	0.00293599	Cacnb4_Cerebellum	CCCCCCCGCCGACCCCAC		1
e873	60335	1.35442	unknown	NA	Kcnma1	intron_se	chr14:24620379-24620398_-	0.00293599	Cacnb4_Cerebellum	CCCGTCCCGTTCCGTTCC		1
e499	21066	1.39501	unknown	NA	Vmn2r63	intron_se	chr7:50169342-50169362_+	0.00348391	Cacnb4_Cerebellum	CCGCTGGTTCCTCCCGCT		1
e932	644	1.3541	unknown	NA	Trerf1	intron_as	chr17:47300957-47300992_-	0.00348391	Cacnb4_Cerebellum	TGTCCCCCCCCCCCACCC		12
e79	10423	1.31685	unknown	NA	Eva1a	intron_se	chr6:81992906-81992925_+	0.00348391	Cacnb4_Cerebellum	AGAGCGCGGCGACGGGTA		1
e81	10431	1.18741	unknown	NA	Fancd2	intron_se	chr6:113509033-113509050_+	0.00378262	Cacnb4_Cerebellum	AGCGACGCTCAGACAGGA		1
e3297	60306	1.3145	unknown	NA	NA	intergenic	chr11:116889250-116889269_-	0.00492488	Cacnb4_Cerebellum	TTCTCAGGCTCCCTCTCC		4
e410	20636	-1.27289	snoRNA	SNORD22	Snhg1	intron_se	chr19:8800439-8800483_+	0.00536915	Cacnb4_Cerebellum	TTCTGGAACAAAGTTTCCTCTTTTCCC		1
e2030	10083	-1.16705	miRNA	mmu-miR-195a-5p	NA	intergenic	chr11:70048564-70048587_+	0.00708723	Cacnb4_Cerebellum	CCAATATTTCTGTGCTGCTA		1
e752	491_2	1.19435	unknown	NA	NA	intergenic	chr14:57312830-57313022_-	0.00731957	Cacnb4_Cerebellum	GCTGTGGTTTCGCTGGATAGTAGGTAG		9
e217	20026	-1.28079	snoRNA	SNORA41	Eef1b2	intron_se	chr1:63225644-63225709_+	0.007964	Cacnb4_Cerebellum	TGTCACACATAATCCTCCTCCTGTGTG		1
e747	474	1.37349	unknown	NA	NA	intergenic	chr14:50682074-50682102_+	0.00876182	Cacnb4_Cerebellum	AGAGCGGTCGCGCCGTGG		1
e751	491_1	1.16884	unknown	NA	NA	intergenic	chr14:57312830-57313022_-	0.00917317	Cacnb4_Cerebellum	GTTCATCCATTCATGCGCGTCA		9
e705	40223	-1.22826	snRNA	U6	Rara	intron_se	chr11:98807806-98807869_+	0.0120504	Cacnb4_Cerebellum	TCATCCTTGAGCAGGGGCCA		4
e750	491	1.23758	unknown	NA	NA	intergenic	chr14:57312830-57313022_-	0.0133302	Cacnb4_Cerebellum	TTAGATGACGAGGCATTTGGCTACCT		8
e858	60259	-1.38354	unknown	NA	Galnt2	intron_se	chr8:126867062-126867108_+	0.0176391	Cacnb4_Cerebellum	GCTAAGCCATCTCTCCAGCCCC		1
e2194	10404	-1.14705	miRNA	mmu-miR-129-1-3p	NA	intergenic	chr6:28972667-28972690_+	0.0204653	Cacnb4_Cerebellum	TACTTTTTGGGGTAAGGGCTT		1
e698	40197	-1.16983	snRNA	U6	NA	intergenic	chr15:17939012-17939058_-	0.0216406	Cacnb4_Cerebellum	GAACGCTTCACGAATTTGCGTGT		1
e2236	10524	1.20412	miRNA	mmu-miR-135a-5p	Glyctk	exon_se	chr9:106056471-106056494_+	0.0219844	Cacnb4_Cerebellum	CACATAGGAATAAAAAGCCATA		2
e2193	104	1.14661	miRNA	mmu-miR-181a-5p	NA	intergenic	chr1:139863044-139863070_+	0.0227175	Cacnb4_Cerebellum	CTCACCGACAGCGTTGAATGT		2
e12	10049	1.17317	unknown	NA	Chst11	intron_se	chr10:82456767-82456785_+	0.0271261	Cacnb4_Cerebellum	AGCGACGCTCAGACAGGC		1
e2022	10075	1.17929	miRNA	mmu-miR-340-5p	Rnf130	intron_se	chr11:49883221-49883244_+	0.0275627	Cacnb4_Cerebellum	ATCAGTCTCATTGCTTTATAA		1
e891	60404	-1.40886	unknown	NA	NA	intergenic	chr1:20732738-20732802_-	0.0280466	Cacnb4_Cerebellum	TGAGCCATCTCTCCAGCCCAT		3
e2372	1539.2_3	1.19167	unknown	NA	NA	intergenic	chrM:1699-2205_+	0.030975	Cacnb4_Cerebellum	CTTCTCGTCTTATTATTATATTTCAG		4
e788	53020	-1.22836	snoRNA	SNORD116	Pwcr1	intron_se	chr7:67042050-67042108_-	0.030975	Cacnb4_Cerebellum	CAGTTCCGATGAGAGTGGCGGTA		21
e505	21073	-1.14512	snoRNA	SNORD32a	Rpl13a	intron_se	chr7:52382754-52382835_-	0.0325119	Cacnb4_Cerebellum	GGTGAGTGTTGCTCATCATGGACTC		1
e1015	836_3	1.24564	unknown	NA	NA	intergenic	chr14:57312830-57313022_-	0.0325119	Cacnb4_Cerebellum	TCTTTCCCCGCTGATTCTGCC		1
e720	43004	-1.22809	unknown	NA	NA	intergenic	chr2:22445476-22445545_-	0.0351564	Cacnb4_Cerebellum	GCTTTGAAGGCTCGCGGA		3
e105	10520	1.1632	unknown	NA	NA	intergenic	chr9:81949786-81949815_-	0.0374196	Cacnb4_Cerebellum	AGGGCTAGGGCTAGGATTAGT		2
e408	20635	-1.27357	snoRNA	SNORD22	NA	intergenic	chr19:8800355-8800418_+	0.037614	Cacnb4_Cerebellum	GGACGTGTGAACATTTCTTCATGGG		1
e792	560	-1.28151	unknown	NA	NA	intergenic	Chr16:33047675-33047776_+	0.0377271	Cacnb4_Cerebellum	TGAGCCATCTCTCCAGCCCG		2
e2252	10546	1.29681	miRNA	mmu-miR-322-5p	NA	intergenic	chrX:50407482-50407506_-	0.0377271	Cacnb4_Cerebellum	CCAAAACATGAATTGCTGCTG		1
e137	129	1.22209	unknown	NA	Tor1aip2	intron_se	chr1:157891383-157891450_+	0.0421409	Cacnb4_Cerebellum	TAATCTGTCAATCCTGTCCGTGTCC		1
e443	20758	1.38806	unknown	NA	Smad9	exon_as	chr3:54559533-54559550_-	0.0484174	Cacnb4_Cerebellum	TTCGGTCCCGCCGCCGCC		1
e290	20285	-2.37407	5' tRF	tRNA (Leu) AAG	NA	intergenic	chr13:21262104-21262159_+	3.59654e-21	AD_3xTG_3M	TAGACCGCTCGGCCACACTACC		9
e307	20350	1.52294	snoRNA	NA	Cox7c	intron_se	chr13:86184592-86184653_-	5.00493e-07	AD_3xTG_3M	ATCATTTTATTCATACTGATTTGCTTCATC		2
e470	20887	-3.27829	snoRNA	SNORD93	NA	intergenic	chr5:23358028-23358096_+	1.67961e-05	AD_3xTG_3M	AATCCTTTAACCCATCACAGCAGCAT		1
e1024	90	-1.27993	unknown	NA	NA	intergenic	chr1:133470469-133470573_+	0.000198288	AD_3xTG_3M	GTGCCGGTATTTAGCCTTAGATGGAGT		3
e847	60154	-1.22678	unknown	NA	NA	intergenic	chr2:122770242-122770262_+	0.000346789	AD_3xTG_3M	AAGCCCAGCTCACGTTCCC		1
e1011	821_1	-1.19737	unknown	NA	Zfp791	intron_se	chr13:9833545-9833767_-	0.000346789	AD_3xTG_3M	GCTGCTCTGCTACGTACGAAACCC		4
e1010	821	-1.24559	unknown	NA	Zfp791	intron_se	chr13:9833545-9833767_-	0.00047776	AD_3xTG_3M	CGTCTACGAATGGTTTAGCGCCA		10
e735	455	-1.22806	unknown	NA	Hexb	intron_se	chr13:97960496-97960586_-	0.000546031	AD_3xTG_3M	CTGCTGTTCACATGGAACCCTTCTC		2
e727	433	-1.21709	unknown	NA	Jarid2	intron_se	chr13:44964943-44965441_-	0.000546031	AD_3xTG_3M	TTTCGGACGAGCCCCTGACTC		4
e832	60082	-1.2	unknown	NA	NA	intergenic	chr15:67336355-67336400_+	0.00060248	AD_3xTG_3M	TTGAGCCATCTCTCCAGCCCC		1
e786	53016	1.27532	snoRNA	SNORD116	NA	intergenic	chr7:66691509-66691541_-	0.000678818	AD_3xTG_3M	CCTGGTTGGGCCTCAGCGTA		188
e993	790	-1.27828	unknown	NA	NA	intergenic	chr2:22600359-22600445_-	0.00297832	AD_3xTG_3M	CGGTACTTGTTGACTATCGGTCTC		1
e801	572	-1.19266	piRNA	mmu-piR-000585	Tmtc2	intron_se	chr16:57391223-57391790_-	0.00352442	AD_3xTG_3M	CTTCACCTTCATTGCGCCACG		2
e891	60404	-1.20861	unknown	NA	NA	intergenic	chr1:20732738-20732802_-	0.00352442	AD_3xTG_3M	TGAGCCATCTCTCCAGCCCAT		3
e714	415	1.25372	5' tRF	tRNA (Glu) TTC	Btn1a1	intron_se	chr13:23555404-23555480_+	0.00377185	AD_3xTG_3M	AATCCTAACCGCTAGACCATGTGGG		8
e154	1392	1.29705	piRNA	mmu-piR-000802	NA	intergenic	chr9:110144309-110144364_+	0.00377185	AD_3xTG_3M	TGGCCTCGAACTCGTGATCCTC		64
e388	20577	-1.34016	tRF	NA	NA	intergenic	chr17:71948611-71948675_+	0.00389655	AD_3xTG_3M	AATGCTCTACCACTGAGCTATACCCCC		21
e673	40058	1.27237	unknown	NA	NA	intergenic	chr19:30100139-30100159_+	0.00903126	AD_3xTG_3M	TTGGTGGCAGCGGTGGGA		1
e915	609	1.19352	snoRNA	NA	NA	intergenic	chr17:35089181-35089256_-	0.0104563	AD_3xTG_3M	GTGGACATCAGAAACTCTAGTCTGTAAATG		1
e635	348	-1.21579	5' tRF	tRNA (Phe) GAA	NA	intergenic	chr13:21253311-21253366_+	0.0119775	AD_3xTG_3M	CGCTCTCCCAACTGAGCTATTTCG		6
e243	20117	-1.17864	unknown	NA	NA	intergenic	chr10:77432751-77432772_+	0.0166687	AD_3xTG_3M	ACCCGGGGCCGCAAGTGC		1
e749	484	1.30717	3' tRF	tRNA (Thr) TGT	NA	intergenic	chr14:51684840-51684888_-	0.0168983	AD_3xTG_3M	GAGGCCCCAGCGAGATTTGAA		1
e171	1494	1.35992	snoRNA	U14 snoRNA	Hspa8	intron_se	chr9:40612830-40612925_+	0.0177533	AD_3xTG_3M	GAAGGTAACTGCCAACACTGCCTTG	e351	1
e823	60024	-1.20007	unknown	NA	NA	intergenic	chr14:122887261-122887306_-	0.0218643	AD_3xTG_3M	TTAACGACTGAGCCATCTCTCCAGC		24
e189	1595	1.29253	3' tRF	tRNA(Arg) CCT	NA	intergenic	chrX:108490826-108490943_+	0.0227513	AD_3xTG_3M	CCCCAGGTGGGACTCGAACC		3
e166	144	1.23952	snoRNA	SNORD81	NA	intergenic	chr1:162968438-162968514_+	0.0228715	AD_3xTG_3M	CAGTGAGAGAGTTCAAGTTGTGTGAGATCA		1
e694	40181_1	1.14518	snoRNA	SNORD4a	Rpl23a	intron_se	chr11:77995187-77995257_-	0.0250554	AD_3xTG_3M	TTGCATCAGACAATAGATCACAATCATCTT		1
e268	20206	-1.20055	5' tRF	tRNA (Cys) GCA	NA	intergenic	chr11:97631139-97631214_-	0.0366176	AD_3xTG_3M	CAGTCAAATGCTCTACCCCTGAGCT		43
e495	21045	-1.13348	unknown	NA	Rfpl4	exon_se	chr7:5062342-5062362_+	0.0366176	AD_3xTG_3M	TGGGCTCTTCCCTGTTCAC		1
e91	1045.1_3	-1.18486	unknown	NM_153599	Cdk8	intron_se	chr5:147072569-147072939_+	0.0411431	AD_3xTG_3M	ACCTCTTAACGGTTTCACGCCC		2
e535	21287	1.22476	snoRNA	U16 snoRNA	Rpl4	intron_se	chr9:64024524-64024573_+	0.0416825	AD_3xTG_3M	CAGCAATAATTTTCGTCAACCTTCTGATT		1
e290	20285	-1.64348	5' tRF	tRNA (Leu) AAG	NA	intergenic	chr13:21262104-21262159_+	3.23183e-10	AD_3xTG_10M	TAGACCGCTCGGCCACACTACC		9
e470	20887	-2.3119	snoRNA	SNORD93	NA	intergenic	chr5:23358028-23358096_+	7.5283e-07	AD_3xTG_10M	AATCCTTTAACCCATCACAGCAGCAT		1
e307	20350	1.52402	snoRNA	NA	Cox7c	intron_se	chr13:86184592-86184653_-	3.98133e-06	AD_3xTG_10M	ATCATTTTATTCATACTGATTTGCTTCATC		2
e467	20870	1.55679	unknown	NA	Htr1d	intron_as	chr4:135981396-135981422_-	4.98988e-05	AD_3xTG_10M	CCCGGCCCCCACCCCCAC		18
e186	159	1.26408	5' tRF	tRNA (Ser) GCT	NA	intergenic	chr2:118872477-118872532_-	0.000419472	AD_3xTG_10M	AACCACTCGGCCACCTCGTC		7
e388	20577	-1.37499	5' tRF	tRNA (Cys) GCA	NA	intergenic	chr17:71948611-71948675_+	0.00421018	AD_3xTG_10M	AATGCTCTACCACTGAGCTATACCCCC		21
e127	1179	1.29245	unknown	NA	NA	intergenic	chr7:19886593-19886682_+	0.00421018	AD_3xTG_10M	CCCCAGACCACTGAGGATCATCC		1
e619	3_1	-1.2652	unknown	NA	Tmtc2	intron_se	chr16:57391223-57391790_-	0.00556774	AD_3xTG_10M	GCCGGGCTTCTTACCCATTTAAAG		13
e1010	821	-1.26482	unknown	NA	Zfp791	intron_se	chr13:9833545-9833767_-	0.00945029	AD_3xTG_10M	CGTCTACGAATGGTTTAGCGCCA		10
e220	20033_2	1.30012	snoRNA	snoRA75	Ncl	intron_se	chr1:88247775-88247877_-	0.0160661	AD_3xTG_10M	ATGTCTCACACAACAGCCAAATATACTTCT		1
e304	20330	1.28202	unknown	NA	Ccdc85c	intron_se	chr12:109457405-109457424_+	0.0319845	AD_3xTG_10M	CGCCCCCCACCGGGCCCC		1
e196	164	1.22425	5' tRF	tRNA (Leu) AAG	NA	intergenic	chr11:68937742-68937855_+	0.0328137	AD_3xTG_10M	GACCGCTCGGCCACGCTAC		4
e1004	805	1.18625	snoRNA	MBII-295	Rc3h2	intron_se	chr2:37255614-37255659_-	0.0406484	AD_3xTG_10M	AACTAAATTTTCACCTCAGAATCTGCCCT		1
e834	60092	-1.3601	unknown	NA	Fgf12	intron_se	chr16:28714623-28714659_+	0.000527323	AD_3xTG_20M	TTTTTTTTTTTTTTTTTTTTTTTTACCCCC		56
e388	20577	-1.44715	5' tRF	tRNA (Cys) GCA	NA	intergenic	chr17:71948611-71948675_+	0.000527323	AD_3xTG_20M	AATGCTCTACCACTGAGCTATACCCCC		21
e817	60007	-1.47685	unknown	NA	NA	intron_se	chr10:32475427-32475473_+	0.000527323	AD_3xTG_20M	TTTTTTTTTTTTTTTTTTTTTTTTTACCCC		1
e290	20285	-1.36156	5' tRF	tRNA (Leu) AAG	NA	intergenic	chr13:21262104-21262159_+	0.00104575	AD_3xTG_20M	TAGACCGCTCGGCCACACTACC		9
e829	60070	-1.33039	unknown	NA	Cacna2d3	intron_as	chr14:30256409-30256444_+	0.00405917	AD_3xTG_20M	TTTTTTTTTTTTTTTTTTTTTCCACCCC		1
e824	60036	-1.58507	unknown	NA	NA	intergenic	chr11:99326362-99326408_+	0.00438131	AD_3xTG_20M	TTTTTTTTTTTTTTTTTTTTTTACCCCCA		2
e3229	546_6	-1.34844	unknown	NA	Zc3h7a	intron_se	chr16:11143999-11144409_+	0.00438131	AD_3xTG_20M	AAGCAGGTCGTCTACGAATGGTTTAGCGCC		5
e148	1375	-1.50569	unknown	NA	Zfp791	intron_se	chr13:9833545-9833767_-	0.00438131	AD_3xTG_20M	GTCTACGTTTAGCGCCAGGTTCCA		1
e714	415	1.20102	5' tRF	tRNA (Glu) TTC	Btn1a1	intron_se	chr13:23555404-23555480_+	0.00958385	AD_3xTG_20M	AATCCTAACCGCTAGACCATGTGGG		8
e789	53021	-1.3496	snoRNA	SNORD116	Pwcr1	intergenic	chr7:67042050-67042108_-	0.0107184	AD_3xTG_20M	TTTTCACTCATTTTGTTCAGCTTTTCCA		25
e2352	151_3	1.32021	5' tRF	tRNA (Ile) AAT	NA	intergenic	chr11:68850497-68850598_+	0.0288861	AD_3xTG_20M	AACTGAGCTAACCGGCCAGCTGCT		1
e2030	10083	-1.40558	miRNA	mmu-miR-195a-5p	NA	intergenic	chr11:70048564-70048587_+	0.0290414	AD_3xTG_20M	CCAATATTTCTGTGCTGCTA		1
e864	60308	-1.32725	unknown	NA	NA	intron_se	chr10:32475427-32475473_+	0.0388096	AD_3xTG_20M	TTTTTTTTTTTTTTTTTTTTTTTTTTTTAC		1
e786	53016	1.20915	snoRNA	SNORD116	NA	intergenic	chr7:66691509-66691541_-	0.039947	AD_3xTG_20M	CCTGGTTGGGCCTCAGCGTA		188
* Additional differentially expressed oligonucleotides targeting the same ncRNA with the same fold change
# Chromosome Position is referring to mm9 UCSC assembly
